# Supplementary material for: Electrodeposition of aluminium foils on carbon electrodes in low temperature ionic liquid
Source: Royal Society of Chemistry journal article supplement (doi:10.1039/c6ra27217g), 2017-01-01
Supplement: c6ra27217g1.pdf [file c6ra27217g1.pdf]

Supporting Information

**Electrodeposition of Aluminium Foils on Carbon Electrodes in Low  
Temperature Ionic Liquid**

*Xianneng Tu<sup>ab</sup>, Junling Zhang<sup>b</sup>, Meng Zhang<sup>a\*</sup>, Yingjun Cai<sup>b</sup>, Haiyan Lang<sup>b</sup>, Guoxin*

*Tian<sup>a</sup>, Yanli Wang<sup>a</sup>*

*<sup>a</sup> Key Laboratory of Superlight Materials and Surface Technology, Ministry of  
Education, Harbin Engineering University, Harbin 150001, P. R. China*

*<sup>b</sup> Beijing Key Laboratory of Ionic Liquids Clean Process, Key Laboratory of Green  
Process and Engineering, Institute of Process Engineering, Chinese Academy of  
Sciences, Beijing 100190, P. R. China*

\* Corresponding author: happymeng1980@hrbeu.edu.cn

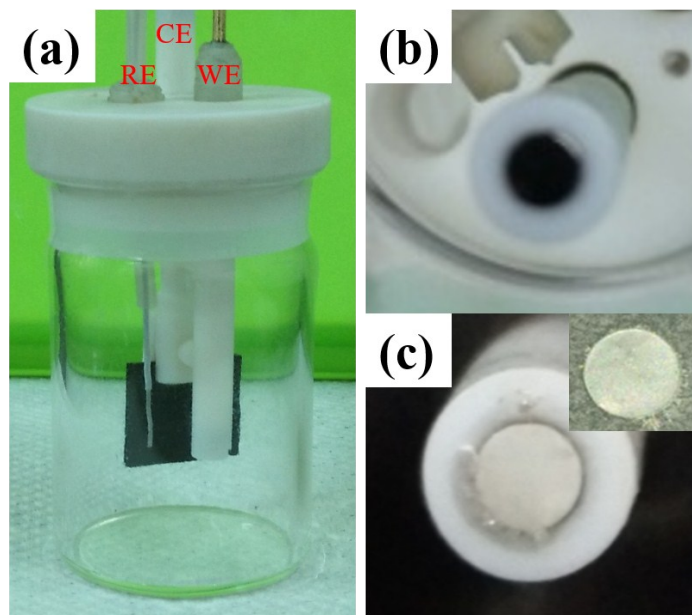

**Fig. S1** (a) aluminium electrodeposit cell, (b) the photography of GC electrode before deposition, (c) the photography of GC electrode after deposition (The inset photography show the peeling aluminium foil)

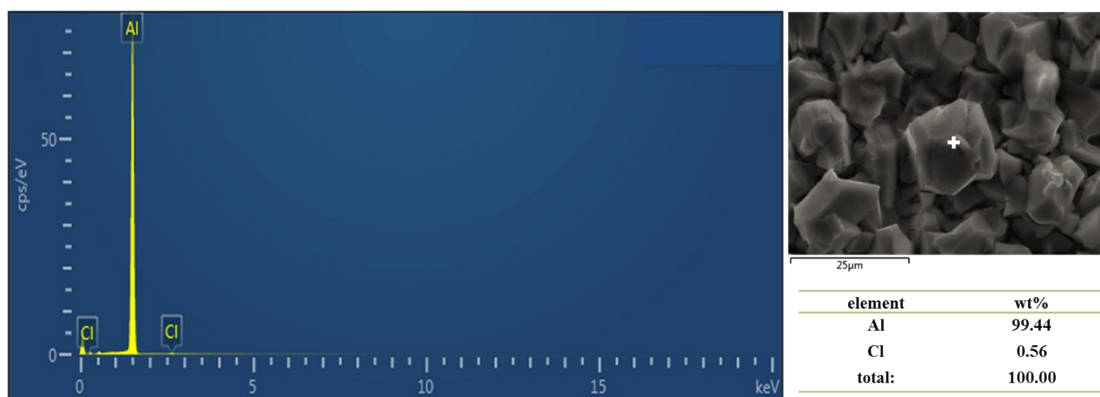

**Fig. S2** EDS analysis of electrodeposited aluminium foils.

EDS analysis of the electrodeposits show only the peaks of aluminium (**Fig. S2**), which indicate that the deposits are composed of high purity aluminium (~99 %). Sometimes, trace amounts (<1 %) Cl was detected from the ionic liquid.

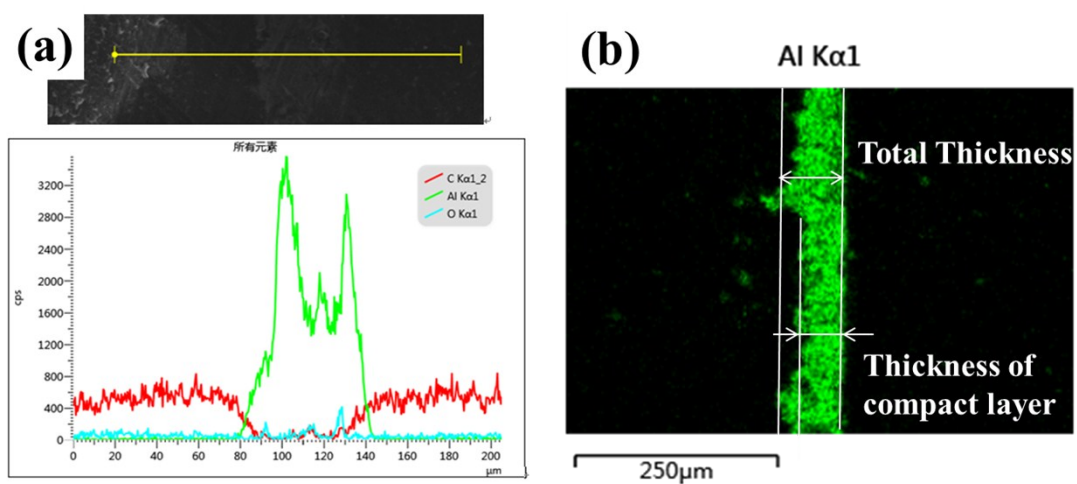

**Fig. S3** (a) EDS elemental (C, Al, O) line scanning image of the cross-section form of

Al foil and (b) EDS elemental (Al) mapping image of the cross-section of Al foil.(

Current density =  $32 \text{ mA}\cdot\text{cm}^{-2}$ , deposit time = 0.5 h, temperature =  $50 \text{ }^{\circ}\text{C}$ )

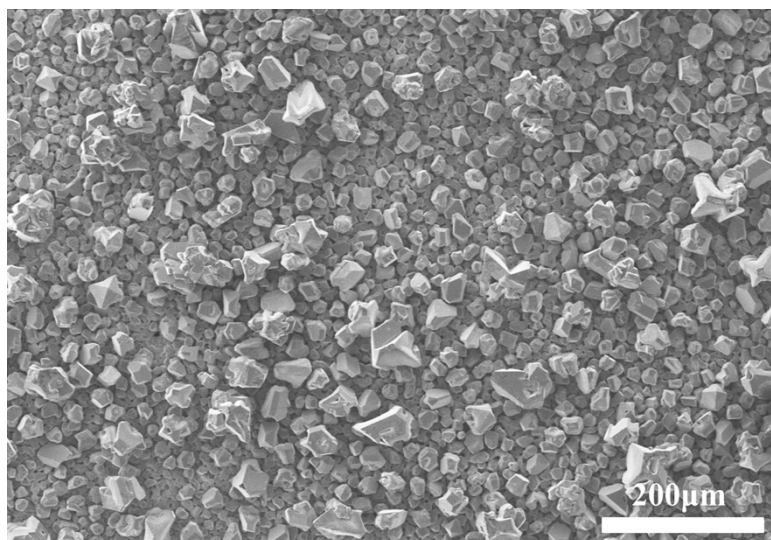

**Fig. S4** SEM image of aluminium foil on graphite electrode (Current density=25  $\text{mA}\cdot\text{cm}^{-2}$ , temperature = 50 °C).
